# Supplementary material
Source: PubMed Central journal article supplement (PMC2891192)
Supplement: NIHMS87671-supplement-01.pdf [file NIHMS87671-supplement-01.pdf]

**Supplementary Table S1: POLG Sequencing Primers used in this Study****Primers for amplification of POLG coding exons**

| Name       | Forward 5'-3'           | Exon(s) | Name        | Reverse 5'-3'          | Size of PCR product(bp) |
|------------|-------------------------|---------|-------------|------------------------|-------------------------|
| PG1E1-1F1  | ACAGGACGTGTCTCTCTCC     | E1      | PG1E1-1R1   | GTGCTGGTCCAGGTTGTCC    | 518                     |
| PG1E1-2F3  | GCAAGTGCTATCCTCGGAG     | E1      | PG1E1-2R2   | CACATCAGCGCTCCCTACG    | 606                     |
| PG1E2F1    | GTAGCTGTTTGAGTTAGGAGC   | E2      | PG1E2R1     | CACAGCTGGTCAACAGATGC   | 474                     |
| PG1E3F1    | CAAGCATGAACAAGCATGAGG   | E3      | PG1E3R1     | AGTCCCAGGATGAGATCTGG   | 471                     |
| PG1E4-5F1  | CAGAAGTCCCAGAGGAAAGC    | E4-5    | PG1E4-5R    | AGCCTAGAAAAGCTAAGGTCC  | 619                     |
| PG1E6-7F1  | AGCTGTGCCATGTCAAGTGG    | E6-7    | PG1E6-7R1   | ACTCTCAATAAGATCTGCTCC  | 659                     |
| PG1E8F     | AGCCACAGCCAGCAAGTTG     | E8      | PG1E8R3     | CTGTCTGAGAATGGAGC      | 461                     |
| PG1E9F     | GGGTGGGGACATTGTGA       | E9      | PG1E9F      | ACCCAAACTCTTTCCACTAGC  | 413                     |
| PG1E10-11F | GAATTGTGGAAGGCACTAGC    | E10-11  | PG1E10-11R  | CTGGCTGGGAAGAAGTACTAGG | 563                     |
| PG1E12F    | CTGATGACGACAGTTTCAGG    | E12     | PG1E10-12R  | GAAAGTCTCAGGTGTGTCCAC  | 282                     |
| PG1E13F    | GGGCTCAGTGTGGGAGG       | E13     | PG1E13R     | GGAATCCAGGGTTAGTCAG    | 338                     |
| PG1E14-15F | TGGAGTATAGCAGTCCTGG     | E14-15  | PG1E14-15R1 | ACTAGAGTCCTGCCTGACC    | 493                     |
| PG1E16-17F | GCCATCCCCTCAGGAAAGG     | E16-17  | PG1E16-17R  | GGACAGTAAAGCAGGCCTCG   | 634                     |
| PG1E18-20F | TGGAAGTGATATGTGAACATTCC | E18-19  | PG1E19R1    | CTACAAACATTGGTAAGGTCC  | 571                     |
| PG1E20F1   | CAGAGTGAAGCTTCTCTTGG    | E20     | PG1E18-20R  | GTCAAAACTGACCAGTCTGG   | 374                     |
| PG1E21F1   | ACAGTGCTGGACCTTCACC     | E21     | PG1E21R1    | ACATTCCTCTGGACACAGG    | 467                     |
| PG1E22F1   | CATGTAACATTACCGTTCGTGG  | E22     | PG1E22R3    | TTTACCCAACAAGCAACAATGC | 440                     |

Note: all primers are linked to M13 universal forward primer (5'-3'): CTC GT TGT AAA ACG ACG GCC AGT(E-forward primer), or M13 universal reverse primer (5'-3'):CTG CT CAG GAA ACA GCT ATG ACC (E-reverse primer). M13 primers are used for sequencing.
